# Supplementary material for: Effect of soybean processing on cell wall porosity and protein digestibility
Source: Royal Society of Chemistry journal article supplement (doi:10.1039/c9fo02167a), 2019-11-20
Supplement: c9fo02167a1.pdf [file c9fo02167a1.pdf]

## Effect of soybean processing on cell wall porosity and protein digestibility

Mostafa Zahir, Vincenzo Fogliano and Edoardo Capuano\*

Food Quality and Design Group, Wageningen University and Research, Wageningen, The  
Netherlands

\* Corresponding authors

E. Capuano, ([edoardo.capuano@wur.nl](mailto:edoardo.capuano@wur.nl)).

Food Quality Design, WU Agrotechnology & Food Sciences, Bornse Weiland 9, 6700 AA  
Wageningen, the Netherlands. Tel: +31 317485690.

### Supplementary Material

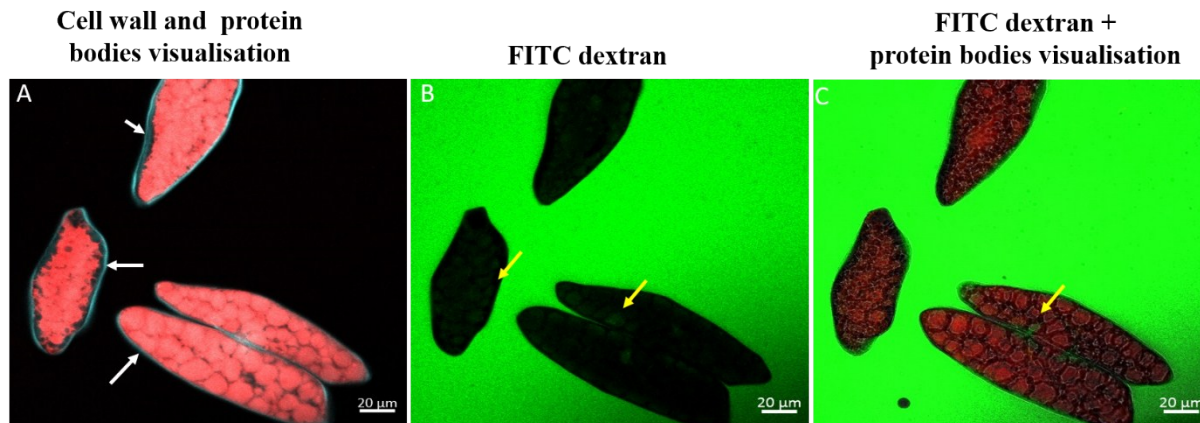

SM -Fig. 1. Confocal micrographs of FITC-dextran 70 kDa (visualized in green) permeation into isolated cells obtained from soaked cotyledons boiled in water for 3.5 h and then treated with pectinase. Cell wall was stained with Calcofluor white and visible in blue only in (A); Protein bodies were stained with Rhodamine B and visible in red. The intact cells in panel A are indicated by the white arrows whereas the weak fluorescence of FITC-dextran 70 kDa within intact cells is indicated by the yellow arrows.

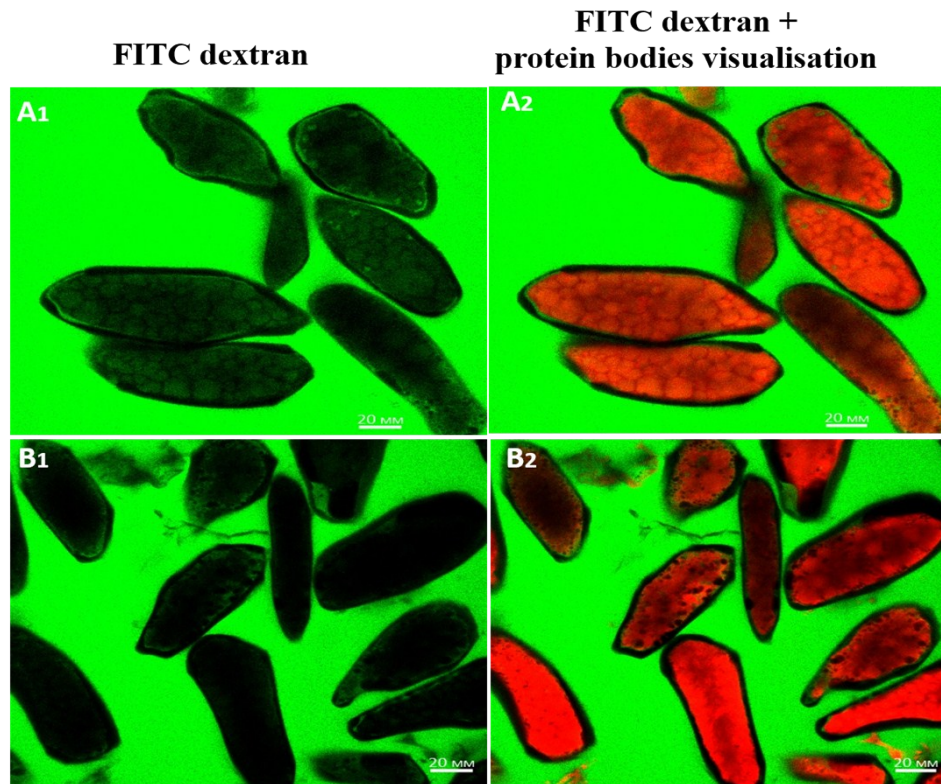

SM -Fig. 2. Confocal micrographs of FITC-dextran 20 and 70 kDa (green colour) permeation into isolated cells of cotyledons boiled for 3.5 h after 24 h exposure to the probe. FITC-dextran molecular weight 20 kDa is shown in top panels A<sub>1</sub>, and A<sub>2</sub> whereas 70 kDa is shown in bottom panels B<sub>1</sub>, and B<sub>2</sub>.

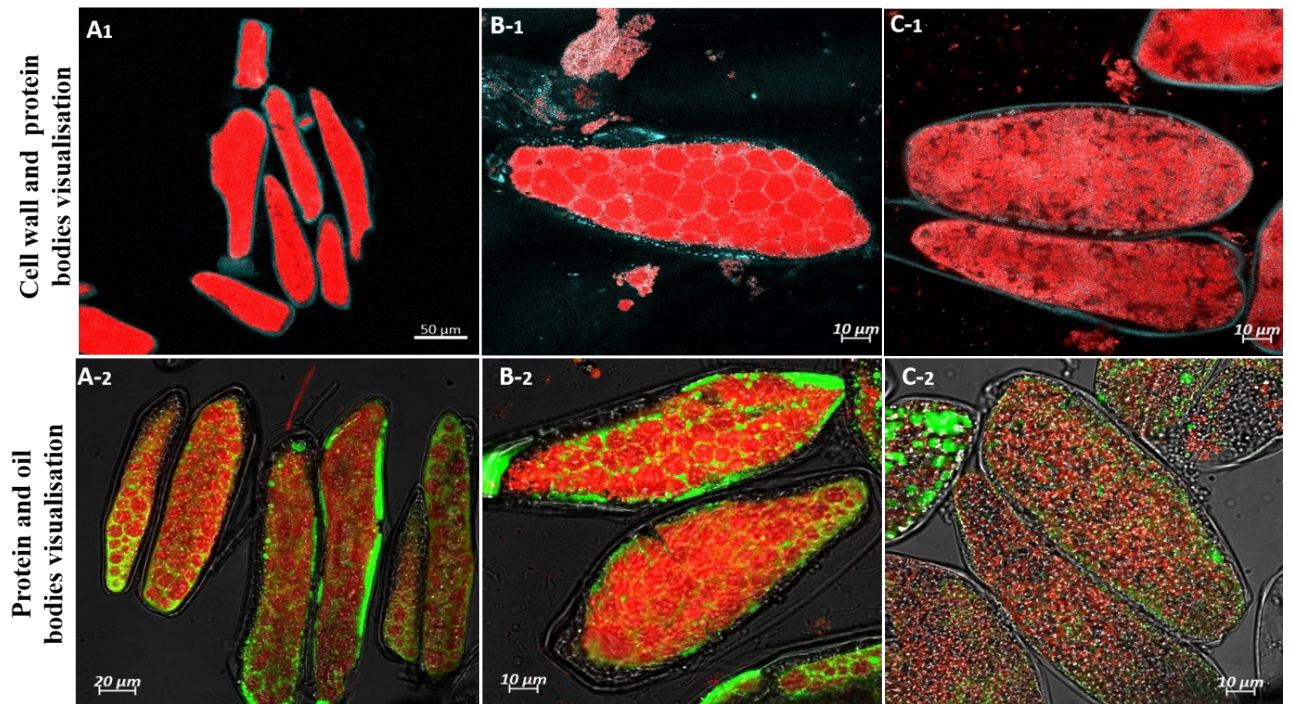

SM -Fig. 3. Confocal laser scanning micrographs of isolated cells; A = cells isolated from boiled cotyledons (BC), B = fermented cells of boiled cotyledons (BCF) and C = cells isolated from boiled cotyledons previously subjected to germination (GBC). Cell wall, protein bodies and oil bodies were stained with Calcofluor white (blue), Rhodamine B (red) and Bodipy 505/515 (green) respectively.
